# Supplementary material for: Nitrogen-doped graphene nanosheet-supported non-precious iron nitride nanoparticles as an efficient electrocatalyst for oxygen reduction
Source: Royal Society of Chemistry journal article supplement (doi:10.1039/c1ra00373a), 2011-01-01
Supplement: c1ra00373a.pdf [file c1ra00373a.pdf]

# Nonprecious iron nitride nanoparticles supported on nitrogen doped graphene nanosheets as efficient electrocatalyst of oxygen reduction reaction in fuel cells

Chi-Wen Tsai,<sup>a</sup> Meng-Hsiu Tu,<sup>a</sup> Chih-Jung Chen,<sup>a</sup> Tai-Feng Hung,<sup>a</sup> Ru-Shi Liu,<sup>\*a</sup>

Wei-Ren Liu,<sup>b</sup> Man-Yin Lo,<sup>b</sup> Yu-Min Peng,<sup>b</sup> Lei Zhang,<sup>c</sup> JiuJun Zhang,<sup>c</sup> D. S. Shy,<sup>d</sup>

and X. K. Xing<sup>d</sup>

<sup>a</sup>*Department of Chemistry, National Taiwan University, Taipei 106, Taiwan, Republic of China,*

<sup>b</sup>*Material and Chemical Research Laboratories, and Industrial Technology Research Institute, Hsinchu 300, Taiwan, Republic of China*

<sup>c</sup>*Institute for Fuel Cell Innovation, National Research Council of Canada, Vancouver, BC, Canada, and*

<sup>d</sup>*Synergys ScienTech Corporation, Science Tech-based Industrial Park, Hsinchu 300, Republic of China*

## Electronic Supplementary Information

---

\*Author to whom correspondence should be addressed; electronic mail: [rsliu@ntu.edu.tw](mailto:rsliu@ntu.edu.tw)

Tel: +886 02 33661169

Fax: +886 02 23636359

Figure S1/3

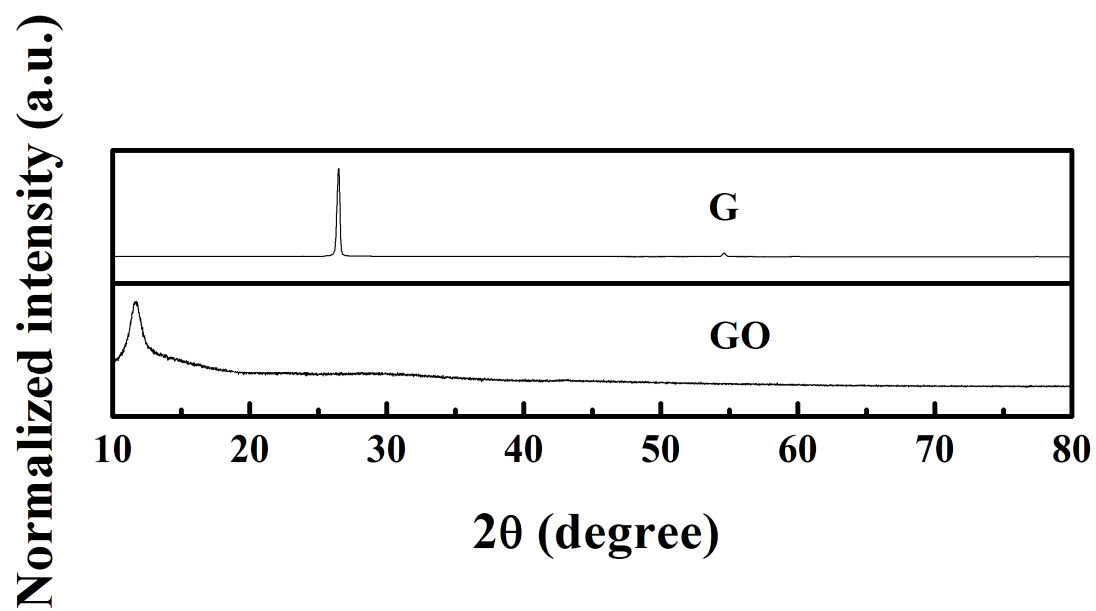

Figure S1. XRD characterization of G and GO for their transformations.

Figure S2/3

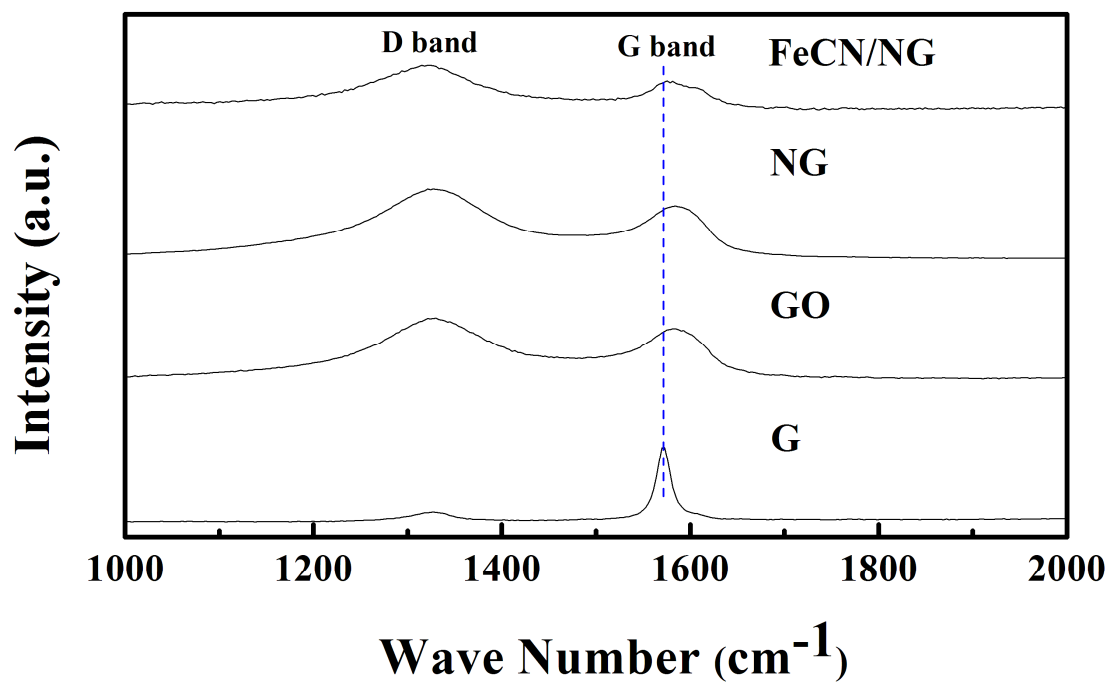

Figure S2. Raman spectra of graphene-based electrocatalysts.

Figure S3/3

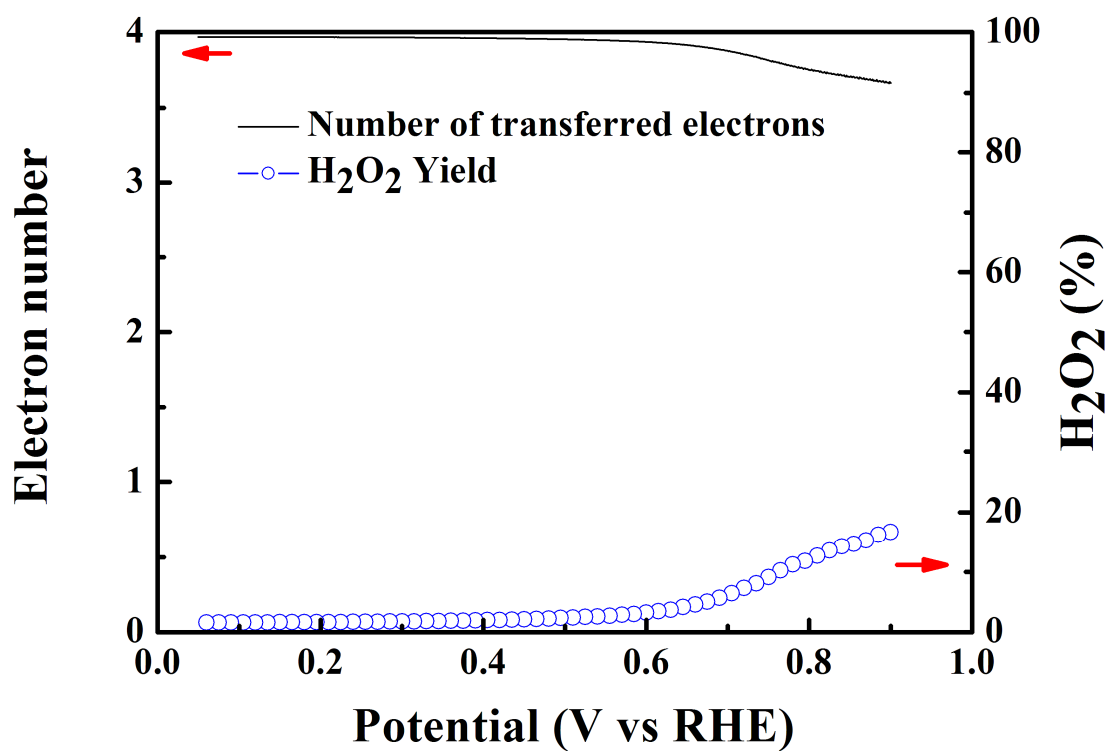

Figure S3. Percentage H<sub>2</sub>O<sub>2</sub> and number of transferred electrons in RRDE test by using FeCN/NG electrocatalysts.
